# Supplementary material
Source: Springer Nature journal article supplement (https://www.springermedizin.de/resource/supplementary/12889_2007_1234_MOESM2_ESM.pdf/9502750)

Cases per 100,000 workers

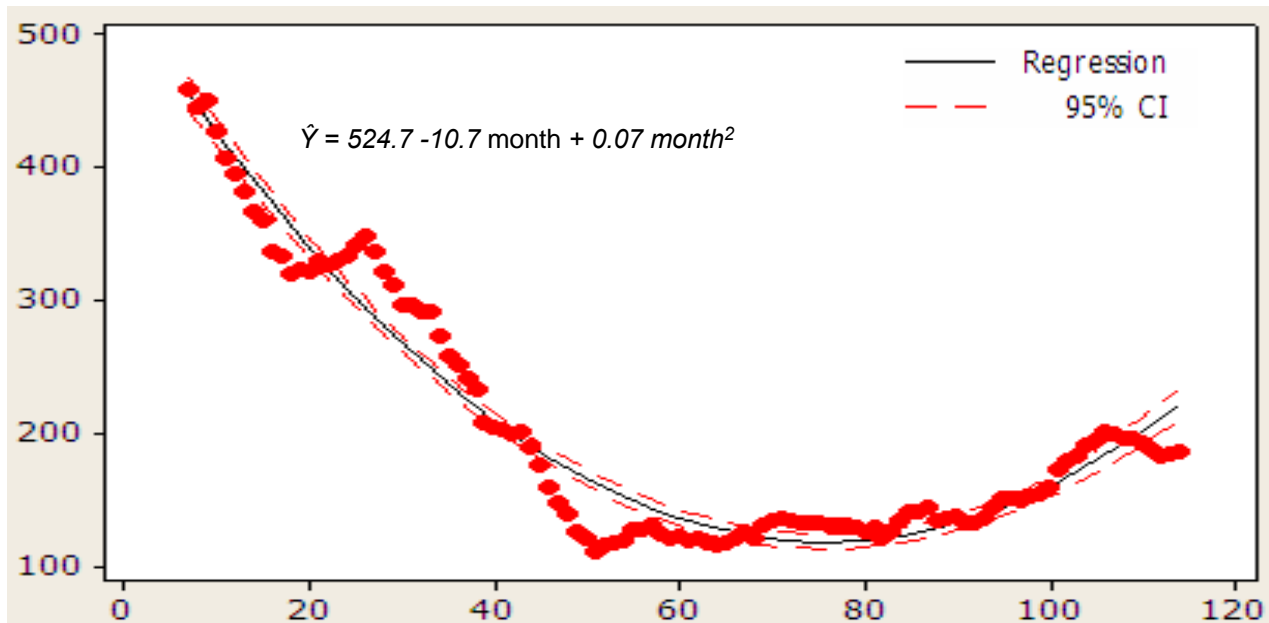

months since 1997

Supplement: MOESM2 [file 9502750]
